1 **RUNNING TITLE**

2 **Molecular profiling of *Artemisia rupestris* L.**

3

4

5 **CORRESPONDING AUTHOR**

6 Zeper Abliz

7 Bioimaging & System Biology Research Center, College of Life and Environmental Sciences,

8 MinZu University of China, Beijing 100081, P. R. China

9 Key Laboratory of Ethnomedicine of Ministry of Education, School of Pharmacy, Minzu

10 University of China, Beijing 100081, P. R. China

11 E-mail: [zeper@muc.edu.cn](mailto:zeper@muc.edu.cn)

12 tel: +8601068932646

13

14

15

16

17

18

19

20

21

22

23

24

25

26

27

28

29

30

31

32

33

34 **Multidimensional molecular differences between artificial and wild *Artemisia rupestris* L.**

35

36 Zhi Zhou<sup>a</sup>, Bin Xie<sup>a</sup>, Bingshu He<sup>a</sup>, Chen Zhang<sup>a</sup>, Lulu Chen<sup>a</sup>, Zhonghua Wang<sup>a</sup>, Yanhua Chen<sup>a</sup>,  
37 Zeper Abliz<sup>a,b,\*</sup>

38

39 <sup>a</sup> Bioimaging & System Biology Research Center, College of Life and Environmental Sciences,  
40 MinZu University of China, Beijing 100081, P. R. China

41 <sup>b</sup> Key Laboratory of Ethnomedicine of Ministry of Education, School of Pharmacy, Minzu  
42 University of China, Beijing 100081, P. R. China

43

44

45 **ONE SENTENCE SUMMARY**

46 A metabolomics-transcriptomics research on *Artemisia rupestris* L. to discover metabolite  
47 differences and the genetic basis between artificial and wild varieties in systematic and novel  
48 manner.

49

50 **FOOTNOTES**

51 **List of author contributions**

52 Z.A. conceived and supervised the study. Z.Z. and X.B. conducted the experiments. C.L. and  
53 W.Z. participated in sample collection. H.B. and Z.C. performed part of the data handling. Z.Z.  
54 analyzed and interpreted the data and results. Z.Z. wrote the manuscript. C.Y. and Z.A. discussed  
55 and revised the manuscript.

56

57 **Funding information**

58 This work was funded by the Natural Science Foundation of China (No. 2167050718 and No.  
59 82003714).

60

61 \* Address correspondence to [zeper@muc.edu.cn](mailto:zeper@muc.edu.cn)

62

63

64

65

66

67 **ABSTRACT**

68 Different ecological environments affect the active ingredients and molecular content of  
69 medicinal plants. *Artemisia rupestris* L. is a kind of traditional medicinal plant, and the shortages  
70 of the wild resource have led to increased use of artificial varieties. However, there have few  
71 investigations referring to molecular differences between them in a systematic manner. In the  
72 present study, artificial and wild *Artemisia rupestris* L. plants were collected in the Altay–Fuyun  
73 region, Xinjian, China. Untargeted metabolomics method based on liquid chromatography-mass  
74 spectrometry (LC-MS) technology was applied to profile flower, stem, and leaf samples,  
75 respectively, and levels of a panel of representative known metabolites in this plant were  
76 simultaneously analyzed. The genetic basis of these samples was explored using a *de novo*  
77 transcriptomics approach to investigate differentially expressed genes (DEGs) and their pathway  
78 annotations. Results indicated metabolic differences between the two varieties mainly reflected  
79 in flavonoids and chlorogenic acid/caffeic acid derivatives. 34 chemical markers (CMs)  
80 belonging to these two structural categories were discovered after validation using another batch  
81 of samples, including 19 potentially new compounds. After correlation analysis, total of six  
82 DEGs in different organs relating to 24 CMs were confirmed using quantitative real-time PCR  
83 (qPCR). These findings provided novel insight into the molecular landscape of this medicinal  
84 plant through metabolomics-transcriptomics integration strategy, and reference information of its  
85 quality control and species identification.

86

87

88

89

90

91

92

93

94

95

96

97

98

99

## 100 INTRODUCTION

101 *Artemisia rupestris* L. (compositae, sagebrush) is a plant used in traditional Chinese Uyghur  
102 medicine and is mainly found in the Xinjiang region of China, central Asia, and Europe (Gu et al.,  
103 2012). It has anti-inflammatory, antibacterial, antiviral, anti-allergy, antitumor, and liver  
104 protective properties (Liu et al., 1986; Xiao et al., 2008; Guo et al., 2009; Fang et al., 2011). It is  
105 commonly used in Uyghur medicine as whole herb, and it is also the key ingredient in  
106 Compound Yizhihao granule that used to treat colds in China (Gu et al., 2012). Because of its  
107 unique ecological characteristics, *Artemisia rupestris* L. mainly depends on wild resources.  
108 However, increased demand and overdevelopment in recent years has depleted this resource and  
109 artificial cultivation has gained increasing attention.

110 To date, more than 100 components have been reported in *Artemisia rupestris* L. The active  
111 ingredients mainly include flavonoids, sesquiterpenoids, organic acids, and alkaloids (Liu et al.,  
112 1985; Song et al., 2006; Ji et al., 2007; Su et al., 2008; Su et al., 2010; Gu et al., 2012; He et al.,  
113 2012). Rupestonic acid, a type of guaiacane sesquiterpenoid, is a characteristic metabolite present  
114 in *Artemisia rupestris* L. that clearly shows anti-influenza virus activity. Various rupestonic acid  
115 derivatives have been synthesized to screen for agents with improved anti-influenza activity and  
116 lower toxicity (Zhou et al., 2012; He et al., 2014; Zhao et al., 2017). Overall, previous studies  
117 into *Artemisia rupestris* L. mainly focused on partial high-abundance components or specific  
118 categories of secondary metabolites. While, as a complex organism, the whole metabolome,  
119 including primary and secondary metabolites, may be involved in its pharmaceutical effect.  
120 There is still a lack of comprehensive and global understanding about the material basis of this  
121 medicinal plant. Furthermore, plant samples are usually treated after drying naturally, which may  
122 alter the content of its constituents and lead to inaccurate assessment.

123 Metabolomics is the systematic study of small molecular metabolites in biological samples  
124 under particular physiological or pathological conditions (Nicholson et al., 1999; Fiehn et al.,  
125 2000). It has been used in plants to investigate conditions such as abiotic stress responses (Tiago  
126 et al., 2016), diversity (Kusano et al., 2015), evolution (Xu et al., 2019), and growth (Wei et al.,  
127 2017). Since plants, including medicinal plants, cannot escape environmental conditions that  
128 adversely affect their growth and development, thus understanding fluctuations in their  
129 metabolome resulting from different ecological factors is important to their pharmaceutical effect  
130 and quality control. At present, few metabolomics studies have examined *Artemisia rupestris* L.  
131 We previously established a metabolomics analytical method for this plant (Chen et al., 2018)  
132 and applied to investigate differences between samples from Altay–Fuyun and Hami regions

133 (Xie et al., 2020), which provided methodological basis for subsequent studies.

134 Multi-omics integration approaches have already been applied due to the rapid progress in  
135 high-throughput data generation (Jamil et al., 2020). Compared with studies using metabolomics  
136 methods independently, other “omics” data could provide a deeper interpretation and enhance  
137 our understanding of the variation in metabolites. In plants, integrating multiple omics methods  
138 remains challenging, largely due to poorly annotated genomes, multiple organelles, and diverse  
139 secondary metabolites (Jamil et al., 2020). Transcriptomics studies focus on the expression levels  
140 of the transcriptionally active elements within genomes (de Wit et al., 2012), and still a good  
141 option even in the absence of a reference genome (Haas et al., 2013).

142 In the present study, a combined untargeted and targeted metabolomics strategy was used to  
143 analyze flower, stem, and leaf samples from *Artemisia rupestris* L. to examine the material  
144 differences between artificial and wild varieties, and identify reliable chemical markers (CMs).  
145 Simultaneously, a *de novo* transcriptomics method was adopted to investigate the genetic basis of  
146 differences between the varieties using matched samples. Pathway and correlation analyses were  
147 used to screen candidates differentially expressed genes (DEGs), which were then confirmed by  
148 quantitative real-time PCR (qRT-PCR). The present study was designed to examine the  
149 molecular differences between the artificial and wild varieties of *Artemisia rupestris* L. on  
150 multiple levels, and provide a strategy reference for phytomedicine studies.

151

## 152 **RESULTS**

### 153 **Establishment of a metabolomics–*de novo* transcriptomics integration strategy to compare** 154 ***Artemisia rupestris* L. varieties**

155 A strategy integrating metabolomics and transcriptomics methods was first established to  
156 systematically identify the molecular differences between artificial and wild *Artemisia rupestris*  
157 L. (Fig.1). Flower, stem, and leaf samples were analyzed separately based on our previous  
158 findings that revealed significant differences in the metabolome of the different organs in this  
159 plant (Chen et al., 2018). An untargeted metabolomics method was applied to profile global  
160 situations of two groups; simultaneously, a panel of known representative metabolites was  
161 targeted analyzed in case important information was missing. Differential metabolites consisting  
162 of unknown and known compounds were validated using another batch of samples to obtain  
163 reliable CMs. *De novo* transcriptomics analysis was conducted due to an absence of a reference  
164 genome. Differences between groups could be observed on a genetic level, and key DEGs  
165 involved in related metabolic pathways of CMs could be identified based on their structure

166 classification. Correlation analysis was used to screen for candidate DEGs for further validation  
167 and qRT-PCR was used to confirm and interpret the genetic basis of CMs.

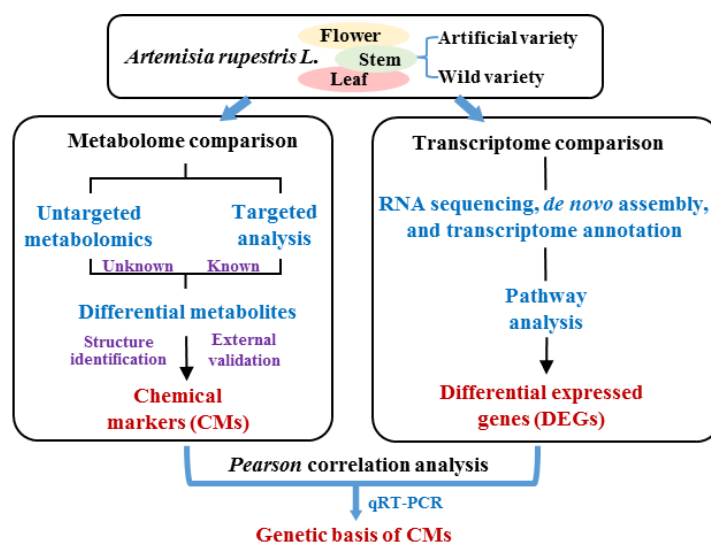

168  
169 **Figure 1.** Scheme of the metabolomics–*de novo* transcriptomics integration strategy for  
170 molecular differences mapping in artificial and wild *Artemisia rupestris* L. and chemical marker  
171 discovery.

172  
173 **Metabolic profiling comparison between artificial and wild *Artemisia rupestris* L.**

174 To ensure reliable results, the quality of data was examined using randomly arranged real  
175 samples, testing stability monitoring of deviation of quality control (QC) samples, and separation  
176 performance stability assessment using retention time deviation of all samples. Subsequent  
177 analyses were performed under conditions that the data quality met the requirements (Zhou et al.,  
178 2017). Typical total ion chromatograms (TICs) revealed that although the metabolic profiles  
179 were similar between the artificial (A) and wild (W) groups and groups regardless of the organ,  
180 several significant differences were detected (Fig.2A). Initial analyses revealed retention time  
181 regions between 12 and 15 min, and 19 and 22 min for flower samples, some metabolites  
182 responded much higher or were only present in one variety. Furthermore, samples from two  
183 groups were completely separated in the score plots of the unsupervised principal component  
184 analysis (PCA) models.

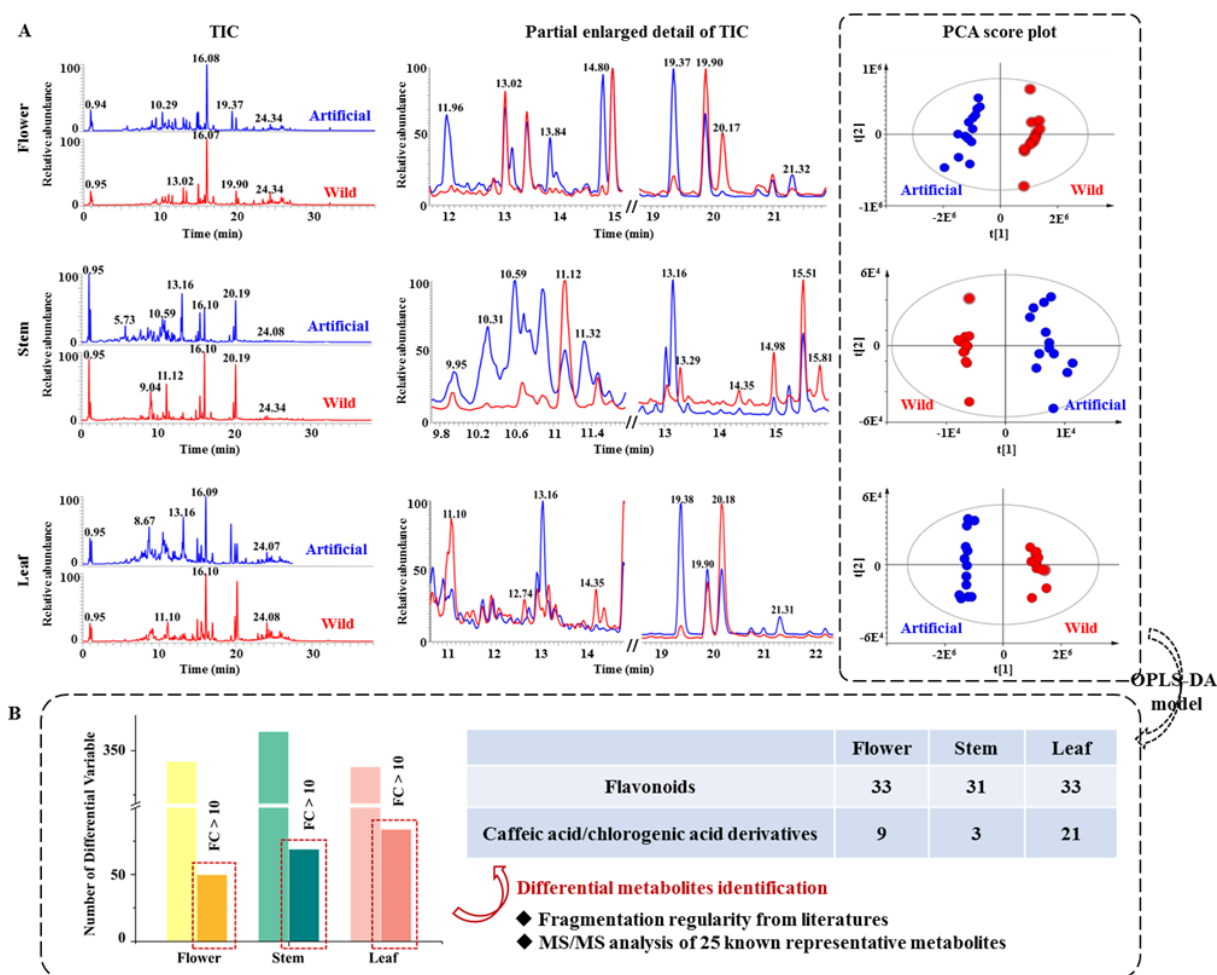

185  
 186 **Figure 2.** Comparison of the metabolic profiling between artificial and wild *Artemisia rupestris*  
 187 L. based on ultrahigh performance liquid chromatography–electrospray ionization–mass  
 188 spectrometry (UHPLC-ESI-MS) data. (A) TICs and partial enlarged details comparison between  
 189 the two groups of flower, stem, and leaf samples, and corresponding PCA score plots. (B) The  
 190 number of differential variables and structural categories of known differential metabolites  
 191 between the two groups in the three organs.

192  
 193 Supervised orthogonal partial least square-discriminate analysis (OPLS-DA) models were  
 194 established after validation of effectiveness, predictive capacity validation, and permutation in  
 195 order to screen for the differential metabolites contributing to group separation. Filtration of  
 196 differential variables was subsequently performed, and only those with a variable importance  
 197 parameter score (VIP) >1 were considered. Adduct and isotope ions, as well as variables with  
 198 crossover between groups, were also deleted. The number of differential variables and those with  
 199 a fold change (FC) >10 in the three organs are shown in Fig.2B. The total numbers of differential  
 200 variables in the three organs were close; however, the number of variables with FC >10 in the

201 leaf sample was the highest.

202 Total of 25 known representative metabolites were targeted analyzed, and 18, 16, and 11  
 203 were detected in the flower, stem, and leaf, respectively (Supplemental Table S1). Combined  
 204 with univariate statistical analysis and the variable plot of the original data, 11, 6, and 9 known  
 205 metabolites showed significant differences between groups in the three sample types. The results  
 206 were similar among the different organs, and mostly had FC <5 (Fig. 3). In particular, linarin  
 207 (M24) and rutinum (M25) showed a higher abundance in the W group. Analysis of individual  
 208 organs revealed isoquercitin (M21) and hyperoside (M22) in the A group flower, caffeic acid  
 209 (M2) and apigenin (M6) in the W group flower, acacetin (M7) in the W group stem, isohamnetin  
 210 (M12) in the A group leaf, and chlorogenic acid (M14) in the W group leaf were more than five  
 211 times higher than in their counterparts. Rupestonic acid showed no significant difference  
 212 between the two groups, but with a slightly higher content in the A group.

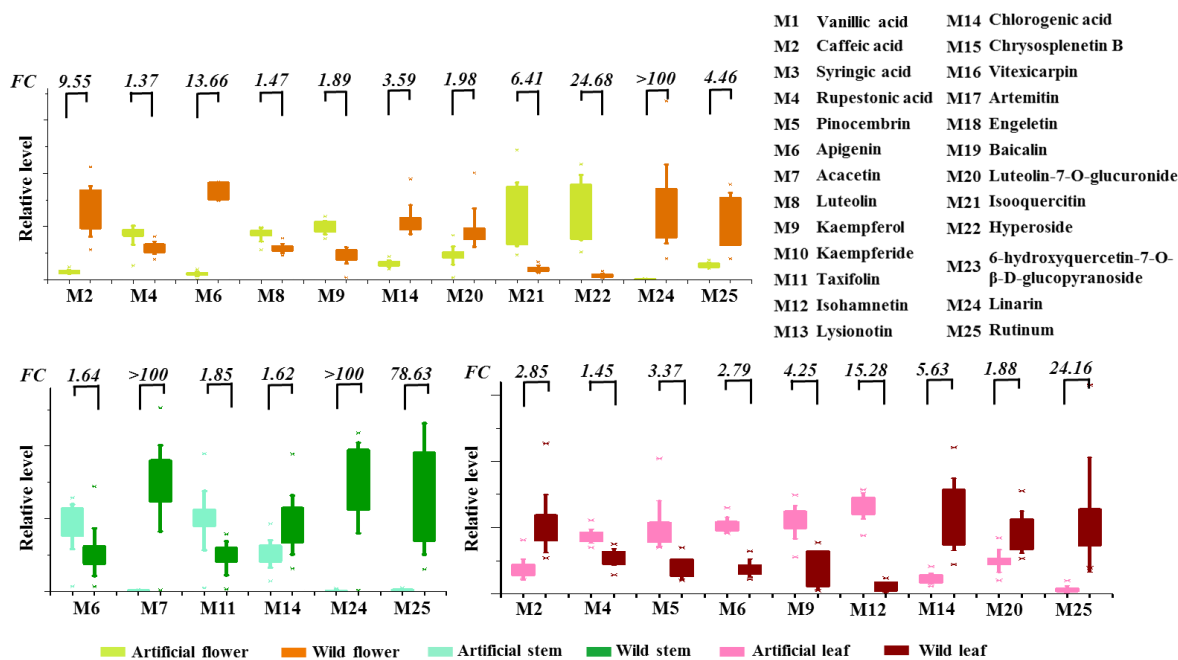

213  
 214 **Figure 3.** Evaluation of representative known metabolites between artificial and wild *Artemisia*  
 215 *rupestris* L. in flower, stem, and leaf.

### 217 Structural identification of differential metabolites

218 Structural classification of differential variables with FC >10 and qualified MS/MS data were  
 219 conducted combining the analysis of the 25 known metabolites and retrieval of the cleavage law  
 220 literature of the same categories.

221 Flavonoids have obvious mass fragmentation regulars. For example, loss of C<sub>3</sub>O<sub>2</sub> (-67.9893)



222 would occur in flavones or isoflavones with 5,7-dihydroxyl substituted A-ring and hydroxyl  
223 substituted B-ring to product  $[M-H-C_3O_2]^-$  (Kang et al., 2007). Additionally, isoflavones may  
224 eliminate  $CO_2$  (-43.9893),  $CO$  (-27.9944), or  $CHO \cdot$  (-29.0022) at the C-ring via a  
225 seven-membered structure, while the C-ring in flavones would lose  $C_2H_2O$  (-42.0103) to  
226 generate  $[M-H-C_2H_2O]$ . In the case of *O*-methylated flavonoids, loss of 15 amu ( $-CH_3$ ) is  
227 common. Furthermore, the  $^{1,3}A^-$  ion (the fragment ion originating from 1/3 bond cleavage in the  
228 C-ring, and containing an intact A-ring) derived from the retro-Diels-Alder reaction is observed  
229 for all flavonoid subclasses (Cuyckens et al. 2004; de Rijke et al. 2006). In terms of  
230 glycosylation compounds, aglycone ions and aglycone radical ions are likely to be present in the  
231 MS/MS spectra (March et al, 2004; Vukicset al, 2010).

232 The MS behavior of chlorogenic acid derivatives was also analyzed. The main product ions  
233 were at  $m/z$  191.0538 [quinic acid-H] and  $m/z$  179.0538 [caffeic acid-H], with an occasional  
234 presence of  $m/z$  146.0901 [cinnamic acid-H] or  $m/z$  193.0501 [ferulic acid-H]. The rule that  
235 191 appears as the base peak was validated as a common feature of chlorogenic acid with acyl  
236 groups connecting to 3-OH or 5-OH on quinic acid (Clifford et al. 2005; Gouveia et al. 2010).  
237 The ion at  $m/z$  173.0384 [quinic acid-H<sub>2</sub>O-H] is likely to be the base peak in the MS/MS  
238 spectra of compounds with acyl groups linked to the 4-OH position of quinic acid.

239 Analysis of the MS/MS spectrum of rupestonic acid revealed that the  $[M-H]^-$  ion at  $m/z$   
240 247.1334 generated high-abundance  $m/z$  203.1436 by losing  $CO_2$  (-43.9898), which could be a  
241 diagnostic ion corresponding to the acid skeleton. Furthermore, ions at  $m/z$  163.1123 and  $m/z$   
242 135.0839 presented at higher collision energy were obtained from further cracking of  $m/z$  203  
243 (Gu et al. 2012). Thus, metabolites with product ions at  $m/z$  247, 203, 163, and 135 in their  
244 MS/MS spectra were recognized as rupestonic acid derivatives.

245 Finally, 97 flavonoids (including 33, 31, and 33 in flower, stem, and leaf samples,  
246 respectively), 35 chlorogenic acid/caffeic acid derivatives (including 9, 3, and 21 in flower, stem,  
247 and leaf samples, respectively) were classified (Fig. 1B). Rupestonic acid derivatives were also  
248 identified and all had FC values <10, with the majority <5.

249

## 250 **RNA sequencing, *de novo* assembly, and transcriptome annotation in *Artemisia rupestris* L.**

251 We sequenced RNA libraries derived from flowers, stem, and leaves. Illumina sequencing from  
252 RNA-sequencing libraries yielded 39.7 million to 45.3 million reads, with 39.8%–44.2% GC  
253 content obtained after eliminating the adaptor sequences. Fast QC analysis showed that 85.78%–

254 91.79% of the total sequences were of quality >Q30. Since the genome sequence of *Artemisia*  
255 *rupestris* L. plant is not available, the reads were further assembled *de novo* into a total of  
256 439,612 unigenes with N50 of 1428 bp (Supplementary Table S2).

257 Functional annotation of the 439,612 unigenes was performed by searching public databases.  
258 Overall, 185,724 (42.3%) unigenes were annotated according to their similarities with known  
259 genes/proteins. The assembled transcripts were annotated using BLASTx against the Nr database.  
260 The match result showed that the top hits for 46.81% of unigenes were from *Cynaracardunculus*  
261 var. *scolymus* (46.81%), followed by *Vitisvinifera* (2.49%), and *Hordeumvulgare* subsp. *vulgare*  
262 (1.97%) (Fig. 4A). Gene ontology (GO) analysis (Fig.4B) identified biological process,  
263 metabolic process, and cellular process were the dominating terms followed by single-organism  
264 process. Among the cellular component, 35.56%, 35.16%, and 31.37% of the annotated genes  
265 were classified into the GO terms cell, cell organ, and membrane. In the molecular function  
266 group, catalytic activity and binding were the principal GO terms.

267

## 268 **Identification of DEGs**

269 The expression profiles of separated organs from two varieties *Artemisia rupestris* L. were  
270 analyzed (Fig. 4C). In flower samples, 20,858 unigenes were upregulated in the W group and  
271 21,132 were downregulated. There was a total of 32,954 (15,871 upregulated and 17,083  
272 downregulated in the W group) and 10,109 (3,456 upregulated and 6,653 downregulated in the  
273 W group) DEGs in the stem and leaf, respectively. All DEGs were subjected to GO analysis (Fig.  
274 4D). In the biological process category, the top three processes of DEG assignment for the three  
275 organs were the same (metabolic, cellular, and single-organism processes). However, the number  
276 of DEGs in each process differed, with 6104–9360 in flower samples, 4374–7460 in stem  
277 samples, and 1452–2670 in leaf samples. “Catalytic activity” and “binding” were the first two in  
278 molecular function terms, followed by transporter activity for flower samples and structural  
279 molecules for stem and leaf samples.

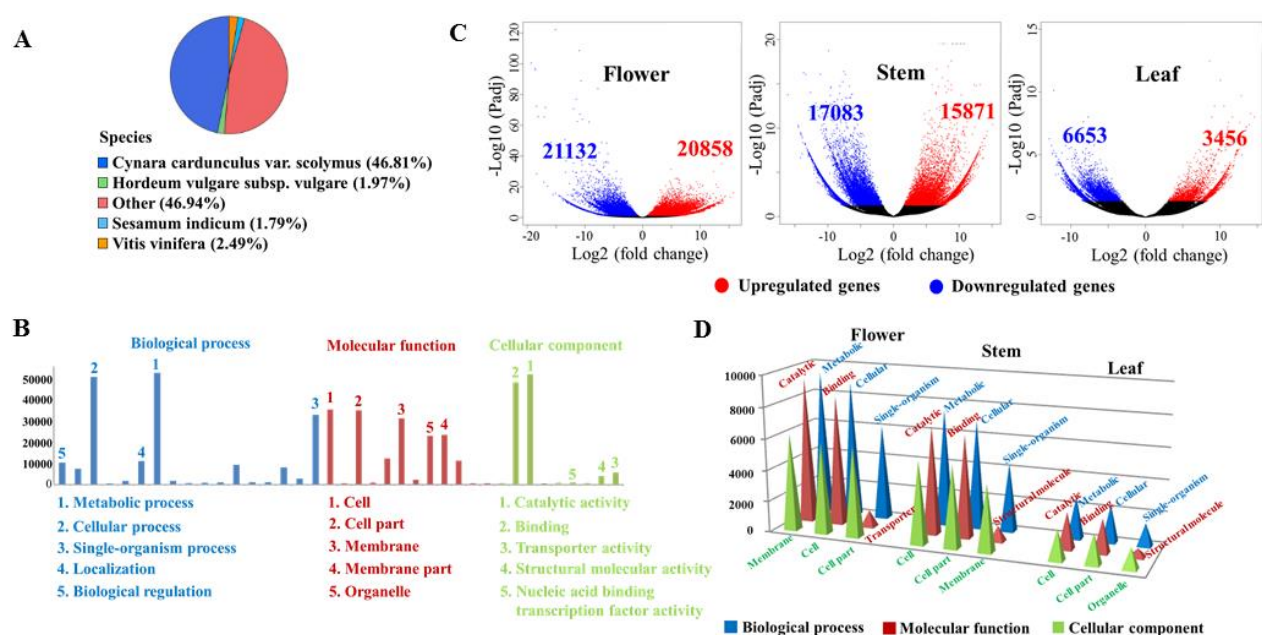

280  
 281 **Figure 4.** Overview of *de novo* transcriptomics analysis of *Artemisia rupestris* L. (A) Top blast  
 282 species distribution for BLASTx matches. (B) GO assignment of unigenes. (C) Volcano plot of  
 283 unigenes expression level in flower, stem, and leaf samples. (D) Top GO function classification  
 284 statistics of differentially expressed unigenes in flower, stem, and leaf samples.

285  
 286 DEGs were subjected to KEGG pathway enrichment analysis. In flower samples, 21,569  
 287 unigenes had hits for 135 KEGG pathways. According to enrichment index Q value (false  
 288 discovery rates corrected), “starch and sucrose metabolism” containing 743 DEGs was the top  
 289 item, followed by “phenylpropanoid biosynthesis,” “other glycan degradation,” “plant–pathogen  
 290 interaction,” and “stilbenoid, diarylheptanoid and gingerol biosynthesis.” In stem samples, 17,236  
 291 unigenes were assigned to 135 KEGG pathways, and the top five enriched pathways were  
 292 “ribosome,” “oxidative phosphorylation,” “biosynthesis of unsaturated fatty acids,”  
 293 “alpha-linolenic acid metabolism,” “circadian rhythm-plant.” In contrast, in leaf samples, 4,452  
 294 unigenes were recognized as items in 134 KEGG pathways, in which “ribosome,” “oxidative  
 295 phosphorylation,” “biosynthesis of unsaturated fatty acids,” “alpha-linolenic acid metabolism,”  
 296 and “fatty acid metabolism” were at the top of the list.

297  
 298 **External validation for CM discovery**

299 Differential metabolites originating from the multivariate statistical and targeted analysis were  
 300 validated using another batch of samples to confirm their reliability. In this assay, a targeted  
 301 analysis method based on parallel reaction monitoring (PRM) was established, which is

302 described as high-resolution multiple reaction monitoring (Ronsein et al., 2015). LC-MS  
303 parameters were the same as those used in the untargeted analysis, with the collision energy  
304 values optimized according to the character of each metabolite. Among the differential  
305 metabolites, total of 34 were confirmed as CMs. These CMs could be completely and correctly  
306 distinguish in the A and W groups (Fig. 5), indicating their high effectiveness and reliability. The  
307 majority of the metabolites had a much higher content in the W group, and the FC values ranged  
308 from 10 to several thousands. The 34 CMs included 11 chlorogenic acid/caffeic acid derivatives  
309 (CCDs), 23 flavonoids, and their putative identification is shown in Table 1 (detailed MS/MS  
310 data can be found in Supplementary Table S3). SciFinder retrieval identified 19 of the CMs as  
311 newly reported compounds due to their absence in the database.

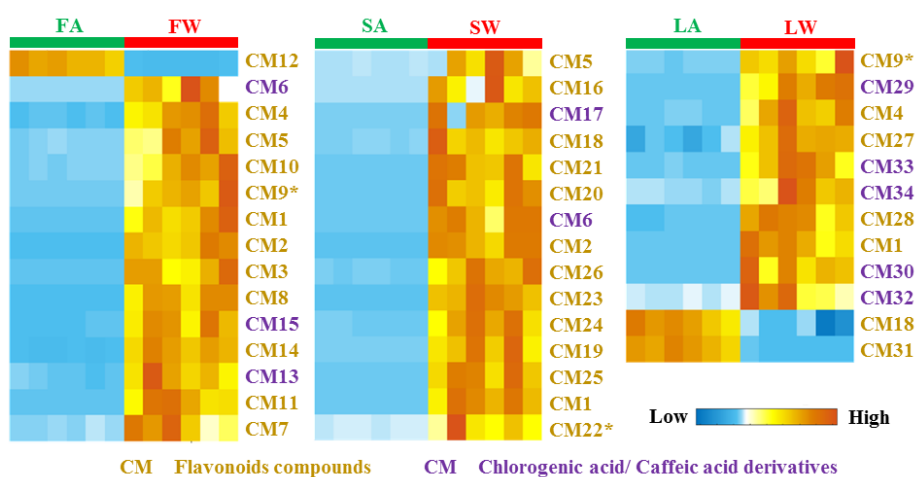

312  
313 **Figure 5.** Cluster heatmap of CMs in artificial and wild *Artemisia rupestris* L. flower, stem, and  
314 leaf samples.  
315 FA: flower, artificial group; FW: flower, wild group; SA: stem, artificial group; SW: stem, wild  
316 group; LA: leaf, artificial group; LW: leaf, wild group.

317  
318  
319  
320  
321  
322  
323  
324  
325  
326

327 **Table 1.** Structural identification of 34 CMs in artificial and wild *Artemisia rupestris* L.

|                                           | Basic structure | Chemical markers | <i>m/z</i> _Rt                                  | Elemental composition                            | Substituent groups                              |                                                    |
|-------------------------------------------|-----------------|------------------|-------------------------------------------------|--------------------------------------------------|-------------------------------------------------|----------------------------------------------------|
| Chlorogenic acid/Caffeic acid derivatives |                 | CM6              | 355.1029_6.54                                   | C <sub>16</sub> H <sub>19</sub> O <sub>9</sub>   | Hex                                             |                                                    |
|                                           |                 | <b>CM29</b>      | 423.0927_6.81                                   | C <sub>19</sub> H <sub>19</sub> O <sub>11</sub>  | Acetic acid alkenyl-QA                          |                                                    |
|                                           |                 | <b>CM30</b>      | 501.1402_13.83                                  | C <sub>25</sub> H <sub>25</sub> O <sub>11</sub>  | Cinnamic acid, Hex                              |                                                    |
|                                           |                 | <b>CM15</b>      | 711.2289_10.48                                  | C <sub>36</sub> H <sub>39</sub> O <sub>15</sub>  | FA-Hex-Hex                                      |                                                    |
|                                           |                 | <b>CM17</b>      | 401.1084_8.67                                   | C <sub>17</sub> H <sub>21</sub> O <sub>11</sub>  | QA                                              |                                                    |
|                                           |                 | CM28             | 373.1135_4.98                                   | C <sub>16</sub> H <sub>21</sub> O <sub>10</sub>  | Hex                                             |                                                    |
|                                           |                 | <b>CM34</b>      | 711.2289_8.67                                   | C <sub>36</sub> H <sub>39</sub> O <sub>15</sub>  | Hex-FA-Hex                                      |                                                    |
|                                           |                 | <b>CM13</b>      | 707.1976_5.71                                   | C <sub>36</sub> H <sub>35</sub> O <sub>15</sub>  | CA, Hydroxy-FA-CA                               |                                                    |
|                                           |                 | CM32             | 529.1351_12.28                                  | C <sub>26</sub> H <sub>25</sub> O <sub>12</sub>  | 3-CA, 4-FA or 4-FA, 5-CA                        |                                                    |
|                                           |                 | CM33             | 529.1351_11.94                                  | C <sub>26</sub> H <sub>25</sub> O <sub>12</sub>  | 3-FA, 4-CA or 3-FA, 5-CA                        |                                                    |
|                                           | Flavonoids      |                  | CM1                                             | 283.0606_14.01                                   | C <sub>16</sub> H <sub>11</sub> O <sub>5</sub>  | /                                                  |
|                                           |                 |                  | CM2                                             | 283.0606_15.24                                   | C <sub>16</sub> H <sub>11</sub> O <sub>5</sub>  | /                                                  |
| CM3                                       |                 |                  | 283.0606_19.92                                  | C <sub>16</sub> H <sub>11</sub> O <sub>5</sub>   | /                                               |                                                    |
| CM9                                       |                 |                  | Linarin                                         | C <sub>28</sub> H <sub>31</sub> O <sub>14</sub>  | 7- <i>O</i> -Hex-dHex                           |                                                    |
|                                           |                 | CM4              | 313.0712_12.91                                  | C <sub>17</sub> H <sub>13</sub> O <sub>6</sub>   | CH <sub>3</sub> , CH <sub>3</sub>               |                                                    |
|                                           |                 | CM11             | 609.1244_12.06                                  | C <sub>30</sub> H <sub>25</sub> O <sub>14</sub>  | CA-Hex                                          |                                                    |
|                                           |                 | <b>CM20</b>      | 533.1448_17.17                                  | C <sub>29</sub> H <sub>25</sub> O <sub>10</sub>  | Rupestonic acid                                 |                                                    |
|                                           |                 | CM27             | 313.0712_12.02                                  | C <sub>17</sub> H <sub>13</sub> O <sub>6</sub>   | CH <sub>3</sub> , CH <sub>3</sub>               |                                                    |
|                                           |                 | CM5              | 313.0712_18.25                                  | C <sub>17</sub> H <sub>13</sub> O <sub>6</sub>   | CH <sub>3</sub>                                 |                                                    |
|                                           |                 | <b>CM10</b>      | 607.1663_12.03                                  | C <sub>28</sub> H <sub>31</sub> O <sub>15</sub>  | CH <sub>3</sub> , 3- <i>O</i> -Pen-Hex          |                                                    |
|                                           |                 | <b>CM19</b>      | 489.1186_12.97                                  | C <sub>27</sub> H <sub>21</sub> O <sub>9</sub>   | CH <sub>3</sub> , 3- <i>O</i> -GlcUA            |                                                    |
|                                           |                 | CM24             | 651.1567_11                                     | C <sub>29</sub> H <sub>31</sub> O <sub>17</sub>  | CH <sub>3</sub> , 3- <i>O</i> -Hex-GlcUA        |                                                    |
|                                           |                 | <b>CM25</b>      | 653.1659_12                                     | C <sub>36</sub> H <sub>29</sub> O <sub>12</sub>  | CH <sub>3</sub> , HCA-FA                        |                                                    |
|                                           |                 | <b>CM26</b>      | 769.1827_8.54                                   | C <sub>33</sub> H <sub>37</sub> O <sub>21</sub>  | 3- <i>O</i> -Hex-Pen-GlcUA                      |                                                    |
|                                           |                 |                  | <b>CM12</b>                                     | 653.1506_9.71                                    | C <sub>32</sub> H <sub>29</sub> O <sub>15</sub> | CH <sub>3</sub> , CH <sub>3</sub> , CA-Hex         |
|                                           |                 |                  | <b>CM21</b>                                     | 547.1246_12.59                                   | C <sub>29</sub> H <sub>23</sub> O <sub>11</sub> | CH <sub>3</sub> , CH <sub>3</sub> , Propylcaffeate |
| <b>CM14</b>                               |                 |                  | 711.1773_8.66                                   | C <sub>31</sub> H <sub>35</sub> O <sub>19</sub>  | Butanoic acid, 3- <i>O</i> -Hex-Hex             |                                                    |
| CM22                                      |                 |                  | Rutin                                           | C <sub>27</sub> H <sub>30</sub> O <sub>16</sub>  | 3- <i>O</i> -Hex-dHex                           |                                                    |
| CM18                                      |                 |                  | 477.1038_7.2                                    | C <sub>22</sub> H <sub>21</sub> O <sub>12</sub>  | CH <sub>3</sub> , 3- <i>O</i> -Hex              |                                                    |
|                                           |                 | <b>CM31</b>      | 519.1291_13.17                                  | C <sub>28</sub> H <sub>23</sub> O <sub>10</sub>  | CH <sub>3</sub> , 3- <i>O</i> -Ethane-FA        |                                                    |
|                                           |                 | <b>CM8</b>       | 577.1557_13.02                                  | C <sub>27</sub> H <sub>29</sub> O <sub>14</sub>  | 3- <i>O</i> -Pen-Hex                            |                                                    |
| <b>CM23</b>                               |                 | 623.1612_11.81   | C <sub>28</sub> H <sub>31</sub> O <sub>16</sub> | 3- <i>O</i> -Hex-GlcUA                           |                                                 |                                                    |
|                                           | <b>CM7</b>      | 419.0978_13.15   | C <sub>20</sub> H <sub>19</sub> O <sub>10</sub> | Methoxy-phenylacetic acid                        |                                                 |                                                    |
|                                           | <b>CM16</b>     | 393.0827_7.61    | C <sub>22</sub> H <sub>17</sub> O <sub>7</sub>  | OH, OCH <sub>3</sub> , <i>O</i> -ethylene glycol |                                                 |                                                    |

328 CMs in bold were not included in SciFinder database.

329 CA, caffeic acid; FA, ferulic acid; GlcUA, glycuronic acid; Hex, hexose; dHex, deoxyhexose;

330 Pen, pentose; QA, quinic acid; Rt, retention time

331

332 CM6, CM15, CM17, CM28, CM29, CM30, and CM34 showed prominent product ions at  
333  $m/z$  193, 149, and 134 in their MS/MS spectra, indicating a ferulic acid (FA) moiety in their  
334 structures. In particular, loss of 308.0901 Da in the CM30 MS/MS spectra was thought to occur  
335 via loss of a coumaroylhexoside moiety. CM15 exhibited a  $[M-H]^-$  ion at  $m/z$  711, and weak  
336 ions at  $m/z$  549 and  $m/z$  387 arising from the sequential loss of two molecules. Furthermore, 162  
337 Da was observed in the MS/MS spectrum, indicating that the two hexoses joined together. CM34  
338 was an isomer of CM15; however, the ion at  $m/z$  387 was absent in its MS/MS spectrum, thus the  
339 order of FA and hexose moieties in this metabolite was different from CM15.

340 CM13 displayed a  $[M-H]^-$  ion at  $m/z$  707, and its MS/MS spectrum revealed a [quinic acid  
341  $-H]^-$  ion at  $m/z$  191 as the base peak, indicating that a quinic acid was substituted at the 3-OH or  
342 5-OH position. Another weak ion at  $m/z$  353 was inferred as caffeoylquinic acid according to the  
343 findings of a previous study (Gu et al. 2012). Thus, CM13 was identified as a quinic acid that  
344 was substituted by caffeoyl and hydroxyl-feruloyl-caffeoyl. A comparison of the MS/MS spectra  
345 of the two isomers, CM32 and CM33, showed that CM32 had base peak at  $m/z$  173, which was  
346 inferred as 3-caffeoyl-4-feruoylquinic acid or 4-feruoyl-5-caffeoylquinic acid, while CM33  
347 exhibited the highest ion at  $m/z$  193, which was identified as 3-feruoyl-4-caffeoylquinic acid or  
348 3-feruoyl-5-caffeoylquinic acid.

349 According to MS fragmentation regularity and characteristic product ions of different basic  
350 structures, eight flavones and 14 flavonol were putatively identified. For example, the  
351 characteristic product ions at  $m/z$  283, 268, 240, 239, and 151 led to the aglycone identification  
352 as acacetin, including CM1, CM2, CM3, and CM9 (linarin). Metabolites with basic  
353 trihydroxydimethoxyflavone structures generated product ions at  $m/z$  313, 298, and 283, such as  
354 CM5, CM10, and CM19. In addition, characteristic neutral losses also help structure analysis.  
355 Loss of 294 Da could be attributed to hexose (162 Da) and pentose (132 Da) groups, and 484 Da  
356 indicated the sugar unit may consist of a hexose (132 Da), a deoxyhexose (146 Da), and a  
357 glycuronic acid (176 Da).

358 The MS/MS spectrum of CM16 was distinctive in that had an ion  $m/z$  299 as the highest  
359 peak and  $m/z$  151; however, there were no obvious characteristic product ions, such as  $m/z$  284,  
360 255 of methylkaempferol or other normal flavonoids. Gu et al. previously analyzed  
361 2-phenoxychromones in *Artemisia rupestris* L., which display an  $[M-H]^-$  ion at  $m/z$  299. Thus,  
362 CM16 was putatively identified as hydroxyl-dihydroethoxy-2-phenoxychromone. The base peak  
363 in the MS/MS spectrum of CM7 was an ion at  $m/z$  153, which indicated it was a type of

364 chalcone.

365

### 366 **DEGs in flavonoids and chlorogenic acid/caffeic acid biosynthetic pathways**

367 Flavonoids and CCDs belong to active substances of *Artemisia rupestris* L. Flavonoid  
368 biosynthesis derives from phenylpropanol metabolism (Supplementary Fig. S1), in which  
369 phenylalanine is converted to cinnamic acid by phenylalanine ammonia lyase (PAL). Cinnamic  
370 acid can then be used to generate caffeic acid, chlorogenic acid, and the skeleton structure of  
371 flavonoids. The present study focused on DEGs that had same function and variation trend in  
372 these pathways. In the W group flower (Fig. 6A), *PAL* gene expression was downregulated,  
373 indicating a reduced initial source of flavonoids and phenylpropanoids. This may have resulted  
374 in the downregulation of subsequent reactions, and our results showed that genes related to  
375 biosynthesis of caffeic acid, isoflavonoids, flavanone, and flavanone, such as *DFR* and *CYP73A*,  
376 were downregulated. On the other hand, *CHS* and *F5H* were upregulated. Interestingly, the  
377 varietal discrepancy in the leaf samples was very different from that of the flower samples (Fig.  
378 6B). It could be that the higher expression of *PAL* in wild *Artemisia rupestris* L. leaf led to an  
379 increased expression of many other key genes in subsequent pathways, including flavonoid  
380 hydroxylation (*F3H*, *CYP75A*, *CYP75B1*), flavonol synthesis (*FLS*), propionyl transference of  
381 isoflavone glycosides (*IF7MAT*), isoflavone methylation (*7-IOMT*), and chlorogenic acid  
382 synthesis (*C3'H*). Meanwhile, some genes involved in phenylpropanoid biosynthesis pathways  
383 were expressed at low levels, including *CAD* and *CCR*. The expression of DEGs in stem samples  
384 was in between that of flower and leaf samples. Elevated expression of *CHS* and *F5H* was  
385 consistent in the flower samples, and lower expression of *IF7GT* was similar in the leaf samples.

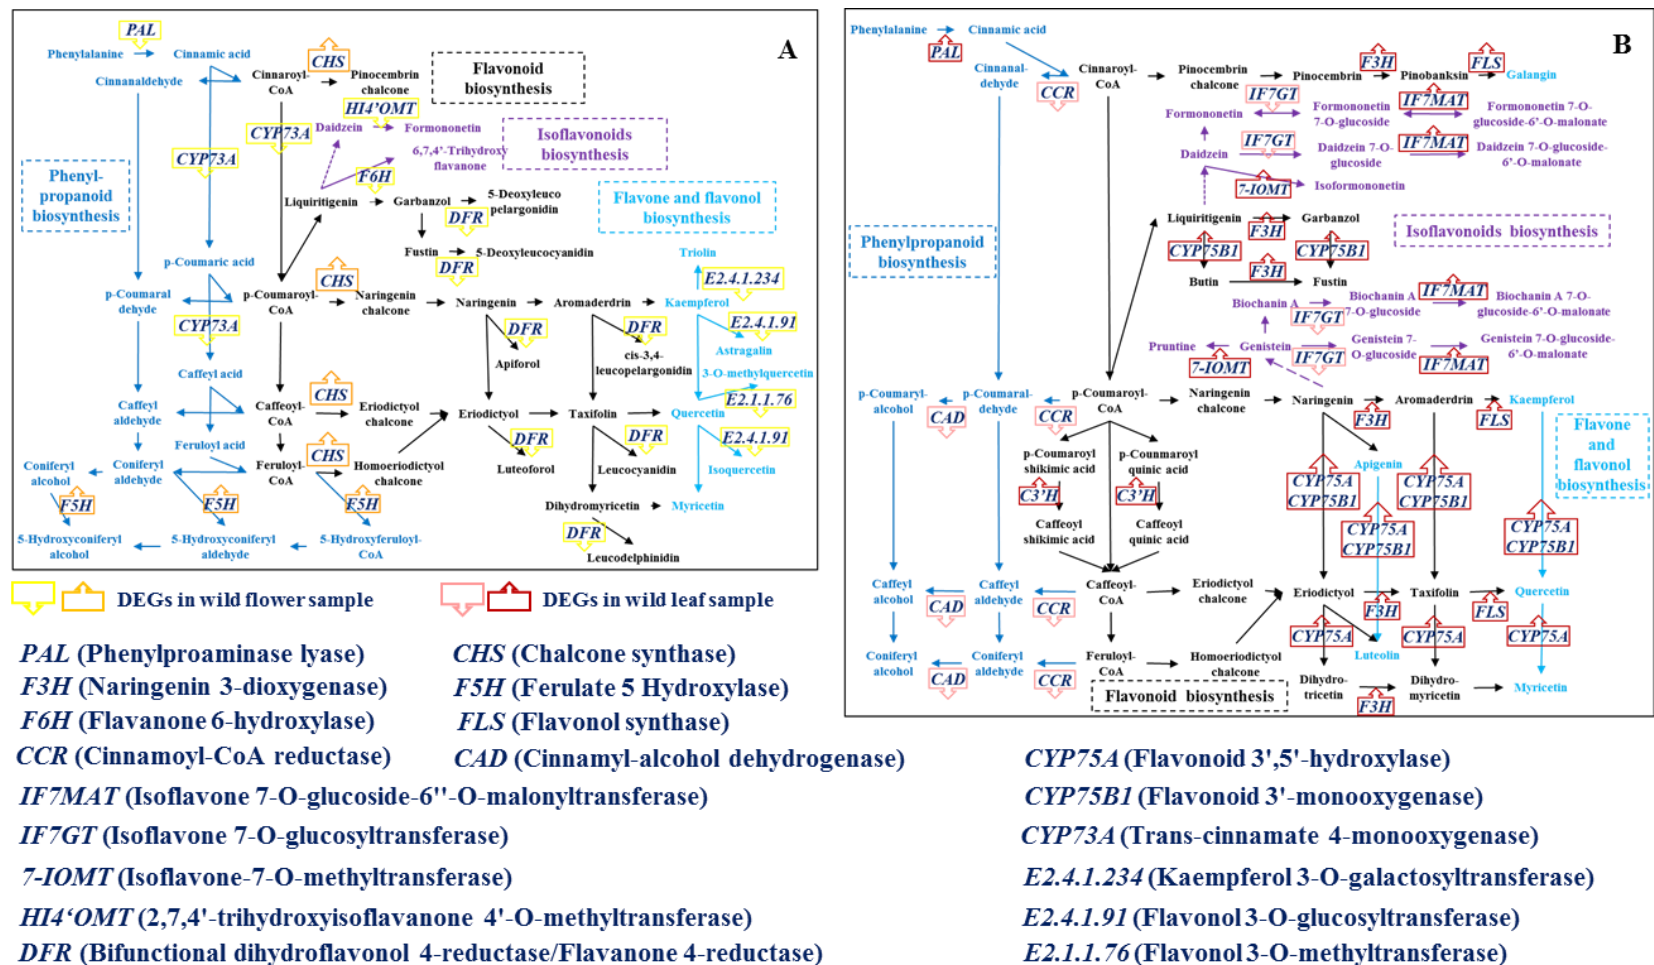

**Figure 6.** DEGs with explicit changes in direction in flavonoid and CCD biosynthetic pathways in *Artemisia rupestris* L. flower and leaf samples based on pathway enrichment analysis of DEGs.



## 339 Genetic basis of CMs based on integration analysis and qRT-PCR

340 Correlation analysis between CMs and DEGs revealed that 13 DEGs showed a close relationship  
341 with 32 CMs in the three organ types (Supplementary Fig. S2). Subsequently, qRT-PCR was  
342 conducted to validate the reliability of these candidate DEGs. In wild flower samples (Fig. 7A),  
343 upregulation of *Unigene98154\_All*, which could be *CHS*, showed a positive relationship with  
344 CM4 and CM7, downregulation of *DFR* showed a negative relationship with CM13, and *EC*  
345 *2.4.1.92* or *EC 2.4.1.234* showed a positive relationship with CM12 and a negative relationship  
346 with CM5 and CM14. Although the other CMs were affected by multiple DEGs, their change in  
347 trend could be explained reasonably. In wild stem samples (Fig. 7B), it was confirmed that there  
348 was a much higher content of *F5H* than in the artificial stem, which was consistent with the  
349 increase of CM19, CM24, and CM26. The increase in CM2, CM20, CM21, and CM25 could be  
350 explained by their negative response to downregulation of *IF7GT*. Under the dual function of  
351 *F5H* and *IF7GT*, the stronger effect from *F5H* resulted in the elevation of CM23 in the wild  
352 group. Finally, after validation, upregulation of *IF7MAT* was associated with increased (CM4,  
353 CM9, CM18, CM29, CM30, CM32 and CM34) and decreased (CM18) levels of eight CMs (Fig.  
354 7C).

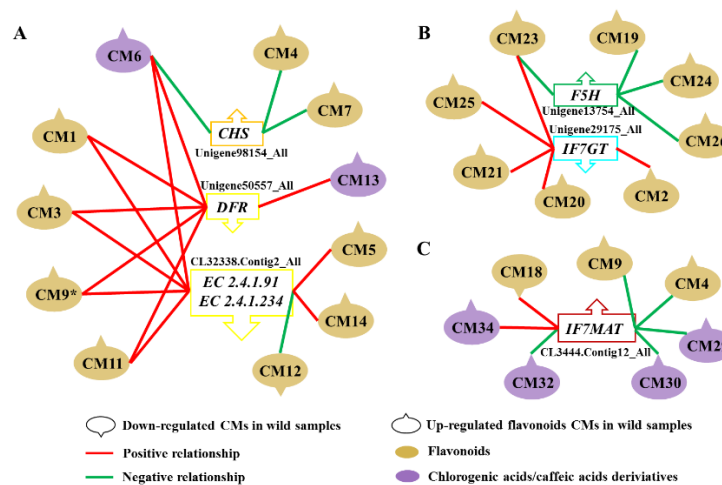

355

356 **Figure 7.** Confirmed relationships between CMs and DEGs by qRT-PCR.

357

## 358 DISCUSSION

359 Plants grow in distinct environments may undergo remarkable reprogramming of their genes and  
360 metabolites. Thus, unraveling the effects of ecological factors at the molecular level is important  
361 for botanical research, especially for medicinal plants. Integration of metabolomics and  
362 transcriptomics is already used for comparative analyses of plants under different conditions (Wu  
363 et al., 2016; Sebastián et al., 2016; Xu et al., 2019; Wei et al., 2018; Guo et al., 2020). However,

364 most of these have focused on one or several classes of known metabolites and model species  
365 and common crops. *Artemisia rupestris* L. is a phytomedicine whose material basis and active  
366 ingredients have not been fully studied. The untargeted and parallel strategy proposed in the  
367 present study using an integrated metabolomics–transcriptomics approach represents a useful  
368 high-throughput tool.

369 This research starting with untargeted metabolomics would help us obtain numerous  
370 differential species including primary and secondary metabolites. Besides, targeted attention to  
371 key known metabolites is recommended and enables the simplest understanding of the  
372 differences, as well as in case of important information omission during untargeted analysis.  
373 Emphatically, external validation was necessary for reliable markers, and could also reduce the  
374 workload of structure identification. *De novo* transcriptomics matched the tissue specificity of  
375 the metabolome and reference genome absence of *Artemisia rupestris* L. plants. Finally, the  
376 method and scale of the integration analysis could be selected focusing on the purpose of the  
377 study. The present study took advantage of the simplicity and intuitiveness of Pearson correlation  
378 analysis and, following qRT-PCR validation, discovered several novel and underexplored  
379 associations.

380 Our metabolomics results revealed clear differences between artificial and wild *Artemisia*  
381 *rupestris* L. plants. Among more than 300 differential varieties of each sample type, the FC  
382 values of at least 50 varieties were >10, the majority of which were flavonoids and CCDs.  
383 Importantly, with the exception of a few, many CMs showed much higher content in wild  
384 samples regardless of the organ. However, the expression of DEGs in the three organs was very  
385 different as most of the upregulated DEGs associated with CMs were present in the leaf samples.  
386 This indicated that the leaf may be the dominant synthetic site of flavonoids and CCDs, and high  
387 concentrations of these metabolites could still accumulate in flowers and stems, although some  
388 biosynthetic pathways were repressed.

389 The conjugated structure of flavonoid compounds could protect the organism from harm of  
390 ultraviolet (UV) radiation, and a close relationship has been reported between flavonoids and  
391 light. Accumulation of flavonoids could be triggered or amplified by UV (Neugart et al. 2019),  
392 and compared with visible light, shorter wavelength light treatment would result in a  
393 significantly higher total flavonoid content (Liu et al. 2018). Chlorogenic acid plays an important  
394 role in the physiological resistance of plants. For example, the phenolic hydroxyl group present  
395 in their structure protects the organism from reactive oxygen species and free radicals, and could  
396 reduce UV damage and increase resistance to microorganisms (Tegelberg, et al. 2004; Clé et al.

397 2008). In the present study, wild *Artemisia rupestris* L. plants grew at a much higher altitude  
398 than the artificial variety. Thus, exposure of the wild variety to stronger UV radiation could have  
399 led to a higher content of flavonoids and CCDs. Moreover, it was reported that UV light affects  
400 plant morphology, and decreases the plant height and leaf area (Yan et al. 2019). The wild plants  
401 we collected were smaller than that of the artificial variety, and they also had short, negligible  
402 branches, and much denser leaves (Supplementary Fig. S3). The characteristics of the wild  
403 species contributed to facilitating flavonoid and CCD synthesis and efficient transport of these  
404 compounds to other parts of the plant to adapt to living in a wild environment. As expected,  
405 unigenes in “plant-pathogen interaction” and “circadian rhythm” belonging to environmental  
406 adaptation pathways were also upregulated in wild species.

407 The characteristic metabolite rupestonic acid in artificial *Artemisia rupestris* L. plant showed  
408 no obvious difference from that in the wild variety, and was slightly higher than the wild variety.  
409 The other rupestonic acid derivatives were the similar. According to the findings of our previous  
410 study, rupestonic acid and its derivatives were mainly distributed in the flower. Our  
411 transcriptome results confirmed that the key DEGs involved in the terpenoid backbone  
412 biosynthesis pathway were downregulated in the wild flower samples. These data indicate that  
413 the ecological environment had little influence on rupestonic acid and its derivatives, and  
414 artificial varieties could be used for drug development directing at this category of ingredients.

415 In summary, our study was the first time to compare artificial and wild *Artemisia rupestris* L.  
416 from the level of metabolome and transcriptome in a systematic manner, and 34 reliable  
417 chemical markers as well as their genetic basis was discovered. During this process, 19 potential  
418 new metabolites were identified, which illustrated high throughput of the strategy used in this  
419 study. The results could provide novel molecular information for material basis research and  
420 quality control of *Artemisia rupestris* L., and also provide reference of research methods and  
421 ideas for other phytochemicals.

422

## 423 **MATERIALS AND METHODS**

### 424 **Plant materials**

425 Artificially cultivated and wild varieties of *Artemisia rupestris* L. were collected at the  
426 full-bloom stage in the Altay–Fuyun region, Xinjiang, China at the altitude of about 800 meters.  
427 Fresh samples were immediately frozen in liquid nitrogen and then transferred to -80 °C for  
428 long-term storage. Flower, stem, and leaf samples of *Artemisia rupestris* L. were analyzed  
429 separately.

## 430 **Chemicals and reagents**

431 Chryso-splenetin B was purchased from Chroma Biotechnology Company Limited (China).  
432 Linarin, vanillic acid, luteolin-7-*O*-glucuronide, and chlorogenic acid were purchased from the  
433 National Institutes for Food and Drug Control (China). Vitexicarpin, rutinum, rupestonic acid,  
434 luteolin, isoquercetin, and artemitin were purchased from Chenguang Biotechnology Company  
435 Limited (China). Taxifolin, 6-hydroxyquercetin-7-*O*- $\beta$ -D-glucopyranoside, kaempferol,  
436 pinocembrin, apigenin, isohamnetin, caffeic acid, syringic acid, cacetin, kaempferide, engeletin,  
437 baicalin, and hyperoside were purchased from ConBon Biotech Company Limited (China).  
438 Lysionotin was purchased from SenBeijia Biological Technology Company Limited (China). The  
439 purities of the above 25 compounds were >98%.

440 Methanol and acetonitrile (HPLC-grade) were purchased from Merck (Germany). Formic  
441 acid (HPLC-grade) was obtained from Roe Scientific Inc. (USA). DEPC water was purchased  
442 from Ambion (USA). Chloroform,  $\beta$ -mercaptoethanol, isoamyl alcohol, and isopropyl alcohol  
443 were purchased from Xilong Chemical Co. Ltd (China).

444

## 445 **Metabolome extraction**

446 Freeze-dried samples were ground to a powder and each 50-mg aliquot was extracted by adding  
447 of 1 mL methanol-water solvent (8:2, v/v, stored at 4 °C) followed by high-speed dispersion for 3  
448 min (25,000 rpm for 1 min, 3,000 rpm for 1 min, 25,000 rpm for 1 min). After ultrasound  
449 treatment for 10 min, the mixture was centrifuged at 13,500 rpm at 4 °C for 10 min. The  
450 supernatant was collected and evaporated to dryness in a SpeedVac concentrator (Thermo  
451 Savant). Sample residues were reconstituted in 1 mL acetonitrile-water (1:1, v/v) and mixed for  
452 10 min by ultrasonic treatment. After centrifugation at 13,500 rpm at 4 °C for 1 min, the  
453 supernatants were filtered using a 0.22- $\mu$ m microporous membrane for LC-MS analysis.

454

## 455 **LC-MS conditions**

456 Chromatographic separation was performed on a reversed-phase Waters HSS T3 column (100  
457 mm  $\times$  2.1 mm, 1.8  $\mu$ m) using an ultra-performance LC system (UltiMate 3000; Thermo Fisher  
458 Scientific). The column was maintained at 40 °C and flushed with aqueous 0.1% formic acid (A)  
459 and acetonitrile 0.1% formic acid (B) using a flow rate of 300  $\mu$ L/min. The gradient conditions  
460 were as follows: 95%–50% (v/v) B at 0–20 min, 50%–2% B at 20–27 min, 2%–2% B at 27–30  
461 min. The injection volume was 5  $\mu$ L.

462 MS was performed using a Q-OT-qIT hybrid mass spectrometer (Orbitrap Fusion Lumos,

463 Thermo Fisher Scientific, USA) equipped with an ESI source. Data were acquired in negative  
464 ion mode. The instrumental parameters were as follows: spray voltage, -3.2 kV; vaporizer  
465 temperature, 350 °C; capillary temperature, 350 °C; resolution, 60,000; and automatic gain  
466 control target,  $1.0e^6$ . The scan range was  $m/z$  100–1000. The PRM method in the validation assay  
467 was built according to the retention time, exact mass, and optimized collision energy of targeted  
468 metabolites. Data were acquired using Xcalibur 4.0 software.

469 Samples were injected in a random order. QC samples derived from different organs were  
470 prepared by mixing equal aliquots from all specific types of authentic samples, termed  
471 flower-QC, stem-QC, and leaf-QC. QC samples were inserted and analyzed regularly per 12  
472 authentic samples to monitor the stability of the LC–MS system (Gika et al., 2007).

473

#### 474 **Data analysis of metabolomics**

475 Raw data were converted to mzXML format using the MassMatrix MS Data File Conversion  
476 Tools (<http://www.massmatrix.net>). Peak detection and alignment were then performed using  
477 XCMS package of R software (version 3.15.2; R project, Vienna, Austria). SIMCA-P (version  
478 15.0) software was used for multivariate statistical analysis of the data obtained via UHPLC–MS  
479 analysis. A PCA model was used to obtain an overview of the distribution of samples and  
480 identify outliers. The OPLS-DA model was used to identify differential metabolites contributing  
481 to group clustering. Finally, potential biomarkers were identified according to their exact  $m/z$   
482 value, MS/MS spectrum, and retention times. METLIN (<http://metlin.scripps.edu/>) was used for  
483 database searching.

484

#### 485 **RNA isolation and sequencing**

486 Total RNA from each 30-mg aliquot of flower, stem, and leaf samples were isolated using 1.5  
487 mL 2% CTAB lysis solution including 2%  $\beta$ -mercaptoethanol. After incubation at 1000 rpm at  
488 65 °C for 20 min, the supernatants were treated twice with chloroform-isoamyl alcohol solvent  
489 (24:1,  $v/v$ ) and isopropyl alcohol. The sediment was then washed using 75% ethyl alcohol and  
490 the dried RNA was dissolved using DEPC water for subsequent analysis. The quality and  
491 quantity of RNA were measured using an Agilent 2100 Bioanalyzer (Agilent Technologies, USA)  
492 and Nanodrop spectrophotometer (NanoDrop 8000, Thermo Fisher Scientific, USA),  
493 respectively. RNA samples with an RNA integrity number  $>7$  were sent to the Rockefeller  
494 University Genomics Resource Center (New York, USA) for next-generation sequencing using  
495 IlluminaHiSeq.

## 596 **De novo transcriptome assembly**

597 Raw data obtained after sequencing were filtered reads that contained adapters, >10% unknown  
598 nucleosides, and >50% low quality bases ( $Q < 20$ ). Clean reads were then assembled into unique  
599 consensus sequences using Trinity. The redundancy was eliminated using Tgicl and further  
500 assembled into a single set of non-redundant unigenes.

501

## 502 **Functional annotation and differential pathway analysis**

503 Unigenes were annotated using BLASTX (E-value cutoff of  $10^{-5}$ ) against six databases: National  
504 Centre for Biotechnology Information (NCBI) non-redundant (Nr), NCBI nucleotide (nt), Gene  
505 Ontology (GO), Cluster of Orthologous Groups (COG), Swiss-Prot, and Gene ontology  
506 and Kyoto Encyclopedia of Genes and Genomes (KEGG). Using the transcriptome assembled by  
507 Trinity as a reference, clean reads of each sample were mapped using RSEM. The normalized  
508 read counts from three replicates of each sample were analyzed, and unigenes that had  
509 significant differences in expression were determined using DEseq. The FDR  $q$  value threshold  
510 was set to 0.005, and the fold change in expression was set to 2.0. KEGG enrichment analysis  
511 was then performed using KOBAS 2.0 with hypergeometric tests to determine the distribution of  
512 unigenes based on their biological pathways. Pathways with FDR  $q$  values  $\leq 0.05$  were  
513 considered to be significantly enriched.

514

## 515 **qRT-PCR**

516 The expression of selected DEGs was determined by qRT-PCR. Gene-specific primers were  
517 designed for 13 candidate genes based on obtained data. PCR was performed at 56 °C and 94 °C  
518 for 3 min 45 s, respectively. The thermal cycling conditions were as follows: 40 cycles at 94 °C  
519 for 20 s for denaturation, and 56 °C for 20 s and 72 °C for 20 s for annealing and extension. After  
520 these reactions, dissociation curve analysis was performed to evaluate the specificity of the  
521 primers. The housekeeping gene,  $\beta$ -tubulin, which has highly abundant and stable expression,  
522 was used as reference gene. All reactions in all experiments were repeated three times.

523

## 524 **SUPPLEMENTAL DATA**

525 The following supplemental materials are available.

526 **Supplemental Table S1.** Detail information of known representative metabolites in *Artemisia*  
527 *rupestris* L.

528 **Supplemental Table S2.** Assembly quality statistics of the *Artemisia rupestris* L. transcriptome.

529 **Supplemental Table S3.** MS/MS data of chemical markers that discovered in three organ types  
530 of artificial and wild *Artemisia rupestris* L.plants.

531 **Supplemental Figure S1.** Diagram of synthesis of flavonoid and chlorogenic acids.

532 **Supplemental Figure S2.** Morphological feature comparison of artificial and wild *Artemisia*  
533 *rupestris* L. a) artificial variety; b) wild variety.

534

#### 535 **ACKNOWLEDGEMENT**

536 This work was funded by the Natural Science Foundation of China (Grant No. 2167050718 and  
537 Grant No. 82003714). We also thank Liu Geyu and Aisa Haji Akber working in the Key  
538 Laboratory of Xinjiang Indigenous Medicinal Plants Resource Utilization, Xinjiang Technical  
539 Institute of Physics and Chemistry, Chinese Academy of Sciences for their support in sample  
540 collection.

541

542

543

544

545

546

547

548

549

550

551

552

553

554

555

556

557

558

559

560

561

562 **TABLES**

563 **Table 1.** Structural identification of 34 CMs in artificial and wild *Artemisia rupestris* L.

|                                                                                     | Basic structure                                                                   | Chemical markers                                                                    | <i>m/z</i> _Rt                                  | Elemental composition                            | Substituent groups                              |                                                    |
|-------------------------------------------------------------------------------------|-----------------------------------------------------------------------------------|-------------------------------------------------------------------------------------|-------------------------------------------------|--------------------------------------------------|-------------------------------------------------|----------------------------------------------------|
| Chlorogenic acid/Caffeic acid derivatives                                           | 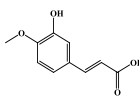 | CM6                                                                                 | 355.1029_6.54                                   | C <sub>16</sub> H <sub>19</sub> O <sub>9</sub>   | Hex                                             |                                                    |
|                                                                                     |                                                                                   | <b>CM29</b>                                                                         | 423.0927_6.81                                   | C <sub>19</sub> H <sub>19</sub> O <sub>11</sub>  | Acetic acid alkenyl-QA                          |                                                    |
|                                                                                     |                                                                                   | <b>CM30</b>                                                                         | 501.1402_13.83                                  | C <sub>25</sub> H <sub>25</sub> O <sub>11</sub>  | Cinnamic acid, Hex                              |                                                    |
|                                                                                     |  | <b>CM15</b>                                                                         | 711.2289_10.48                                  | C <sub>36</sub> H <sub>39</sub> O <sub>15</sub>  | FA-Hex-Hex                                      |                                                    |
|                                                                                     |                                                                                   | <b>CM17</b>                                                                         | 401.1084_8.67                                   | C <sub>17</sub> H <sub>21</sub> O <sub>11</sub>  | QA                                              |                                                    |
|                                                                                     |                                                                                   | CM28                                                                                | 373.1135_4.98                                   | C <sub>16</sub> H <sub>21</sub> O <sub>10</sub>  | Hex                                             |                                                    |
|                                                                                     |                                                                                   | <b>CM34</b>                                                                         | 711.2289_8.67                                   | C <sub>36</sub> H <sub>39</sub> O <sub>15</sub>  | Hex-FA-Hex                                      |                                                    |
|                                                                                     |  | <b>CM13</b>                                                                         | 707.1976_5.71                                   | C <sub>36</sub> H <sub>35</sub> O <sub>15</sub>  | CA, Hydroxy-FA-CA                               |                                                    |
|                                                                                     |                                                                                   | CM32                                                                                | 529.1351_12.28                                  | C <sub>26</sub> H <sub>25</sub> O <sub>12</sub>  | 3-CA, 4-FA or 4-FA, 5-CA                        |                                                    |
|                                                                                     |                                                                                   | CM33                                                                                | 529.1351_11.94                                  | C <sub>26</sub> H <sub>25</sub> O <sub>12</sub>  | 3-FA, 4-CA or 3-FA, 5-CA                        |                                                    |
|                                                                                     | Flavonoids                                                                        |    | CM1                                             | 283.0606_14.01                                   | C <sub>16</sub> H <sub>11</sub> O <sub>5</sub>  | /                                                  |
|                                                                                     |                                                                                   |                                                                                     | CM2                                             | 283.0606_15.24                                   | C <sub>16</sub> H <sub>11</sub> O <sub>5</sub>  | /                                                  |
| CM3                                                                                 |                                                                                   |                                                                                     | 283.0606_19.92                                  | C <sub>16</sub> H <sub>11</sub> O <sub>5</sub>   | /                                               |                                                    |
| CM9                                                                                 |                                                                                   |                                                                                     | Linarin                                         | C <sub>28</sub> H <sub>31</sub> O <sub>14</sub>  | 7- <i>O</i> -Hex-dHex                           |                                                    |
|    |                                                                                   | CM4                                                                                 | 313.0712_12.91                                  | C <sub>17</sub> H <sub>13</sub> O <sub>6</sub>   | CH <sub>3</sub> , CH <sub>3</sub>               |                                                    |
|                                                                                     |                                                                                   | CM11                                                                                | 609.1244_12.06                                  | C <sub>30</sub> H <sub>25</sub> O <sub>14</sub>  | CA-Hex                                          |                                                    |
|                                                                                     |                                                                                   | <b>CM20</b>                                                                         | 533.1448_17.17                                  | C <sub>29</sub> H <sub>25</sub> O <sub>10</sub>  | Rupestonic acid                                 |                                                    |
|                                                                                     |                                                                                   | CM27                                                                                | 313.0712_12.02                                  | C <sub>17</sub> H <sub>13</sub> O <sub>6</sub>   | CH <sub>3</sub> , CH <sub>3</sub>               |                                                    |
|  |                                                                                   | CM5                                                                                 | 313.0712_18.25                                  | C <sub>17</sub> H <sub>13</sub> O <sub>6</sub>   | CH <sub>3</sub>                                 |                                                    |
|                                                                                     |                                                                                   | <b>CM10</b>                                                                         | 607.1663_12.03                                  | C <sub>28</sub> H <sub>31</sub> O <sub>15</sub>  | CH <sub>3</sub> , 3- <i>O</i> -Pen-Hex          |                                                    |
|                                                                                     |                                                                                   | <b>CM19</b>                                                                         | 489.1186_12.97                                  | C <sub>27</sub> H <sub>21</sub> O <sub>9</sub>   | CH <sub>3</sub> , 3- <i>O</i> -GlcUA            |                                                    |
|                                                                                     |                                                                                   | CM24                                                                                | 651.1567_11                                     | C <sub>29</sub> H <sub>31</sub> O <sub>17</sub>  | CH <sub>3</sub> , 3- <i>O</i> -Hex-GlcUA        |                                                    |
|                                                                                     |                                                                                   | <b>CM25</b>                                                                         | 653.1659_12                                     | C <sub>36</sub> H <sub>29</sub> O <sub>12</sub>  | CH <sub>3</sub> , HCA-FA                        |                                                    |
|                                                                                     |                                                                                   | <b>CM26</b>                                                                         | 769.1827_8.54                                   | C <sub>33</sub> H <sub>37</sub> O <sub>21</sub>  | 3- <i>O</i> -Hex-Pen-GlcUA                      |                                                    |
|                                                                                     |                                                                                   |  | <b>CM12</b>                                     | 653.1506_9.71                                    | C <sub>32</sub> H <sub>29</sub> O <sub>15</sub> | CH <sub>3</sub> , CH <sub>3</sub> , CA-Hex         |
|                                                                                     |                                                                                   |                                                                                     | <b>CM21</b>                                     | 547.1246_12.59                                   | C <sub>29</sub> H <sub>23</sub> O <sub>11</sub> | CH <sub>3</sub> , CH <sub>3</sub> , Propylcaffeate |
|                                                                                     |                                                                                   |                                                                                     | <b>CM14</b>                                     | 711.1773_8.66                                    | C <sub>31</sub> H <sub>35</sub> O <sub>19</sub> | Butanoic acid, 3- <i>O</i> -Hex-Hex                |
|                                                                                     |                                                                                   |                                                                                     | CM22                                            | Rutin                                            | C <sub>27</sub> H <sub>30</sub> O <sub>16</sub> | 3- <i>O</i> -Hex-dHex                              |
| CM18                                                                                |                                                                                   |                                                                                     | 477.1038_7.2                                    | C <sub>22</sub> H <sub>21</sub> O <sub>12</sub>  | CH <sub>3</sub> , 3- <i>O</i> -Hex              |                                                    |
| <b>CM31</b>                                                                         |                                                                                   |                                                                                     | 519.1291_13.17                                  | C <sub>28</sub> H <sub>23</sub> O <sub>10</sub>  | CH <sub>3</sub> , 3- <i>O</i> -Ethane-FA        |                                                    |
|  | <b>CM8</b>                                                                        | 577.1557_13.02                                                                      | C <sub>27</sub> H <sub>29</sub> O <sub>14</sub> | 3- <i>O</i> -Pen-Hex                             |                                                 |                                                    |
|                                                                                     | <b>CM23</b>                                                                       | 623.1612_11.81                                                                      | C <sub>28</sub> H <sub>31</sub> O <sub>16</sub> | 3- <i>O</i> -Hex-GlcUA                           |                                                 |                                                    |
|  | <b>CM7</b>                                                                        | 419.0978_13.15                                                                      | C <sub>20</sub> H <sub>19</sub> O <sub>10</sub> | Methoxy-phenylacetic acid                        |                                                 |                                                    |
|                                                                                     | <b>CM16</b>                                                                       | 393.0827_7.61                                                                       | C <sub>22</sub> H <sub>17</sub> O <sub>7</sub>  | OH, OCH <sub>3</sub> , <i>O</i> -ethylene glycol |                                                 |                                                    |

564 CMs in bold were not included in SciFinder database.

565 CA, caffeic acid; FA, ferulic acid; GlcUA, glycuronic acid; Hex, hexose; dHex, deoxyhexose;

566 Pen, pentose; QA, quinic acid; Rt, retention time



567 **FIGURE LEGENDS**

568 **Figure 1.** Scheme of the metabolomics–*de novo* transcriptomics integration strategy for  
569 molecular differences mapping in artificial and wild *Artemisia rupestris* L. and chemical marker  
570 discovery.

571 **Figure 2.** Comparison of the metabolic profiling between artificial and wild *Artemisia rupestris*  
572 L. based on ultrahigh performance liquid chromatography–electrospray ionization–mass  
573 spectrometry (UHPLC-ESI-MS) data. (A) TICs and partial enlarged details comparison between  
574 the two groups of flower, stem, and leaf samples, and corresponding PCA score plots. (B) The  
575 number of differential variables and structural categories of known differential metabolites  
576 between the two groups in the three organs.

577 **Figure 3.** Evaluation of representative known metabolites between artificial and wild *Artemisia*  
578 *rupestris* L. in flower, stem, and leaf.

579 **Figure 4.** Overview of *de novo* transcriptomics analysis of *Artemisia rupestris* L. (A) Top blast  
580 species distribution for BLASTx matches. (B) GO assignment of unigenes. (C) Volcano plot of  
581 unigenes expression level in flower, stem, and leaf samples. (D) Top GO function classification  
582 statistics of differentially expressed unigenes in flower, stem, and leaf samples.

583 **Figure 5.** Cluster heatmap of CMs in artificial and wild *Artemisia rupestris* L. flower, stem, and  
584 leaf samples.

585 FA: flower, artificial group; FW: flower, wild group; SA: stem, artificial group; SW: stem, wild  
586 group; LA: leaf, artificial group; LW: leaf, wild group.

587 **Figure 6.** DEGs with explicit changes in direction in flavonoid and CCD biosynthetic pathways  
588 in *Artemisia rupestris* L. flower and leaf samples based on pathway enrichment analysis of  
589 DEGs.

590 **Figure 7.** Confirmed relationships between CMs and DEGs by qRT-PCR.

591

592

593

594

595

596

597

598

599

600 **LITERATURE CITED**

- 601 Chen, LL, Wang, ZH, Zhou, Z, He, BS, He, JM, Huang, LJ, Nurbolat, A, Liu, GY, Aisa, HA,  
602 Abliz, Z (2018) The development of plant metabolomics analytical approach based on  
603 liquid chromatography tandem mass spectrometry in *Artemisia rupestris* L. *Chin J Anal*  
604 *Chem* 46: 735–742
- 605 Clé, C, Hill, LM, Niggeweg, R, Martin, CR, Guisez, Y, Prinsen, E, Jansen, MAK (2008)  
606 Modulation of chlorogenic acid biosynthesis in *Solanum lycopersicum*; consequences for  
607 phenolic accumulation and UV-tolerance. *Phytochemistry* 69: 2149–2156
- 608 Clifford, MN, Knight, S, Kuhnert, N (2005) Discriminating between the six isomers of  
609 dicaffeoylquinic acid by LC-MS(n). *J Agric Food Chem* 53: 3821–3832
- 610 Cuyckens, F, Claeys, M (2004) Mass spectrometry in the structural analysis of flavonoids. *J*  
611 *Mass Spectrom* 39: 1–15
- 612 deRijke, E, Out, P, Niessen, WMA, Ariese, F, Gooijer, C, and Brinkman, UAT (2006) Analytical  
613 separation and detection methods for flavonoids. *J Chromatogr A* 1112: 31–63
- 614 de Wit, P, Pespeni, MH, Ladner, JT, Barshis, DJ, Seneca, F, Jaris, H, Therkildsen, NO, Morikawa,  
615 M, Palumbi, SR (2012) The simple fool's guide to population genomics via RNA-Seq: an  
616 introduction to high-throughput sequencing data analysis. *Mol Ecol Resour* 12: 1058–1067
- 617 Fang, MZ, Chao, QF, Lan, Y, Liu, XN, Xu, X (2011) Antibacterial effect of the extract from  
618 *Artemisia rupestris* L. *Food Sci Technol* 36: 160–163
- 619 Fiehn, O, Kopka, J, Dörmann, P, Altmann, T, Trethewey, RN, Willmitzer, L (2000) Metabolite  
620 profiling for plant functional genomics. *Nat Biotechnol* 18: 1157–1161
- 621 Gika, HG, Theodoridis, GA, Wingate, JE, Wilson, ID (2007) Within-day reproducibility of an  
622 HPLC-MS-based method for metabolomic analysis: application to human urine. *J*  
623 *Proteome Res* 6: 3291–3303
- 624 Gouveia, SC, Castilho, PC (2010) Characterization of phenolic compounds in  
625 *Helichrysum melaleucum* by high-performance liquid chromatography with on-line  
626 ultraviolet and mass spectrometry detection. *Rapid Commun. Mass Spectrom* 24: 1851–  
627 1868
- 628 Gu, D, Yang, Y, Abdulla, R, Aisa, HA (2012) Characterization and identification of chemical  
629 compositions in the extract of *Artemisia rupestris* L. by liquid chromatography coupled to  
630 quadrupole time-of-flight tandem mass spectrometry. *Rapid Commun Mass Spectrom* 26:  
631 83–100
- 632 Guo, J, Wu, YQ, Wang, GB, Wang, TL, Cao, FL (2020) Integrated analysis of the transcriptome

- 633 and metabolome in young and mature leaves of *Ginkgo biloba* L. *Ind. Crops Prod*  
634 143:<http://www.ncbi.nlm.nih.gov/pubmed/111906>
- 635 Guo, SS, Gao, YJ, Shi, YJ, Su, D, Cui, XL, Wang, YZ (2009) The study on the mechanism of  
636 antihepatitis B virus in vitro by flavonoids extract from Nilfiol herb. *Chin J Exp Trad Med*  
637 *Formulae* 15: 72–74
- 638 Haas, BJ, Papanicolaou, A, Yassour, M, Grabherr, M, Blood, PD, Bowden, J, Couger, MB,  
639 Eccles, D, Li, B, Lieber, M, MacManes, MD, Ott, M, Orvis, J, Pochet, N, Strozzi, F, Weeks,  
640 N, Westerman, R, William, T, Dewey, CN, Henschel, R, LeDuc, RD, Friedman, N, Regev, A  
641 (2013) De novo transcript sequence reconstruction from RNA-seq using the Trinity platform  
642 for reference generation and analysis. *Nat Protoc* 8: 1494–1512
- 643 He, F, Nugroho, AE., Wong, CP, Hirasawa, Y, Shirota, O, Morita, H, Aisa, HA (2012) Rupestines  
644 F—M, new Guaipyridine Sesquiterpene alkaloids from *Artemisia rupestris*. *Chem Pharm*  
645 *Bull* 60: 213–218
- 646 He, YW, Dong, CZ, Zhao, JY, Ma, LL, Li, YH, Aisa, HA (2014) 1,2,3-Triazole-containing  
647 derivatives of rupestonic acid: click-chemical synthesis and antiviral activities against  
648 influenza viruses. *Eur J Med Chem* 76: 245–255
- 649 Jamil, IN, Remali, J, Azizan, KA, NorMuhammad, NAN, Arita, M, Goh, HH, Aizat, WM (2020)  
650 Systematic multi-omics integration (MOI) approach in plant systems biology. *Front Plant*  
651 *Sci* 11: 944
- 652 Ji, TF, Yang, JB, Song, WX, Wang, AG, Su, YL, Yuan, L (2007) Studies on chemical constituents  
653 of *Artemisia rupestris* (II). *China J Chin Mater Med* 32: 1187–1189
- 654 Kang, J, Hick, LA, Price, WE (2007) A fragmentation study of isoflavones in negative  
655 electrospray ionization by MS<sup>n</sup> ion trap mass spectrometry and triple quadrupole mass  
656 spectrometry. *Rapid Commun Mass Spectrom* 21: 857–868
- 657 Kusano, M, Yang, ZG, Okazaki, Y, Nakabayashi, R, Fukushima, A, Saito, K (2015) Using  
658 metabolomic approaches to explore chemical diversity in rice. *Mol Plant* 8: 58–67
- 659 Liu, Y, Fang, SZ, Yang, WX, Shang, XL, Fu, XX (2018) Light quality affects flavonoid  
660 production and related gene expression in *Cyclocarya paliurus*. *J Photochem Photobiol B*  
661 179: 66–73
- 662 Liu, YM, Yu, DQ (1985) Studies on the chemical constituents of *Artemisia rupestris* L. *Acta*  
663 *Pharmacol Sin* 20: 514–518
- 664 Liu, Y, Liu, W, 1986. *Pharmacography of Uighur, Part I*. Urumqi. Xinjiang People's Publishing  
665 House. Urumqi, pp. 3–4

- 666 March, RE, Miao, XS, Metcalfe, CD, Stobiecki, M, Marczak, L (2004) A fragmentation study of  
667 an isoflavone glycoside, genistein-7-O-glucoside using electrospray quadrupole  
668 time-of-flight mass spectrometry at high mass resolution. *Int J Mass Spectrom* 232: 171–  
669 183
- 670 Neugart, S, Tobler, MA, Barnes, PW (2019) Different irradiances of UV and PAR in the same  
671 ratios alter the flavonoid profiles of *Arabidopsis thaliana* wild types and UV-signalling  
672 pathway mutants. *Photochem Photobiol Sci* 18: 1685–1699
- 673 Nicholson, JK, Lindon, JC, Holmes, E (1999) “Metabonomics”: understanding the metabolic  
674 responses of living systems to pathophysiological stimuli via multivariate statistical analysis  
675 of biological NMR spectroscopic data. *Xenobiotica* 29: 1181–1189
- 676 Ronsein, GE, Pamir, N, von Haller, PD, Kim, DS, Oda, MN, Jarvik, GP, Vaisar, T, Heinecke, JW  
677 (2015) Parallel reaction monitoring (PRM) and selected reaction monitoring (SRM) exhibit  
678 comparable linearity, dynamic range and precision for targeted quantitative HDL  
679 proteomics. *J Proteomics* 113: 388–399
- 680 Moschen, S, Bengoa Luoni, S, Di Rienzo, JA, Caro, Mdel P, Tohge, T, Watanabe, M, Hollmann, J,  
681 González, S, Rivarola, M, García-García, F, Dopazo, J, Hopp, HE, Hoefgen, R, Fernie, AR,  
682 Paniego, N, Fernández, P, Heinz, RA (2016) Integrating transcriptomic and metabolomic  
683 analysis to understand natural leaf senescence in sunflower. *Plant Biotechnol J* 14: 719–734
- 684 Song, WX, Ji, TF, Si, YK, Su, YL (2006) Studies on chemical constituents in herb from  
685 *Artemisia rupestris*. *China J Chin Mater Med* 31: 1790–1792
- 686 Su, Z, Wu, HK, Yang, Y, Aisa, HA, Slukhan, U, Aripova, S (2008) Preparative isolation of  
687 guaipyridinesquiterpene alkaloid from *Artemisia rupestris* L. flowers using high-speed  
688 counter-current chromatography. *J Sep Sci* 31: 2161–2166
- 689 Su, Z, Wu, H, He, F, Slukhan, U, and Aisa, HA (2010) New guaipyridinesquiterpene alkaloids  
690 from *Artemisia rupestris* L. *Helv Chim Acta* 93: 33–38
- 691 Tegelberg, R, Julkunen-tiitto, R, Aphalo, P. (2004) Red: far-red light ratio and UV-B radiation:  
692 their effects on leaf phenolics and growth of silver birch seedlings. *Plant Cell Environ* 27:  
693 1005–1013
- 694 Jorge, TF, Rodrigues, JA, Caldana, C, Schmidt, R, van Dongen, JT, Thomas-Oates, J, Ant6nio, C  
695 (2016). Mass spectrometry-based plant metabolomics: metabolite responses to abiotic  
696 stress. *Mass Spectrom. Rev* 35: 620–649
- 697 Vukics, V, Guttman, A (2010) Structural characterization of flavonoid glycosides by multi-stage  
698 mass spectrometry. *Mass Spectrom Rev* 29: 1–16.

- 699 Wei, GF, Dong, LL, Yang, J, Zhang, LJ, Xu, J, Yang, F, Cheng, RY, Xu, R, Chen, SL (2018).  
700 Integrated metabolomics and transcriptomic analyses revealed the distribution of saponins  
701 in *Panax notoginseng*. *Acta Pharmacol Sin B* 8: 458–465
- 702 Wu, S, Alseikh, S, Cuadros-Inostroza, Á, Fusari, CM, Mutwil, M, Kooke, R, Keurentjes, JB,  
703 Fernie, AR, Willmitzer, L, Brotman, Y (2016) Combined use of genome-wide association  
704 data and correlation networks unravels key regulators of primary metabolism in *Arabidopsis*  
705 *thaliana*. *PLOS Genet* 12: e1006363
- 706 Xiao, W, Sirafil, A, Li, ZJ (2008) Study on the anti-inflammatory effect of the extract of  
707 *Artemisia rupestris* L. *Lishizhen Med Mater Med Res* 19: 2836–2838
- 708 Xie, B, Zhou, Z, Zhang, C, Chen, LL, Huo, ML, Nurbolat, A, Liu, GY, Aisa, HA, Wang, ZH,  
709 Abliz, Z (2020) A multi-dimensional study on origin markers of *Artemisia rupestris* L.  
710 based on plant metabolomics. *Chin J Anal Chem* 48: 733–743
- 711 Xu, GH, Cao, JJ, Wang, XF, Chen, QY, Jin, WW, Li, Z, Tian, F (2019) Evolutionary  
712 metabolomics identifies substantial metabolic divergence between maize and its wild  
713 ancestor, teosinte. *Plant Cell* 31: 1990–2009
- 714 Yan, Y, Stoddard, FL, Neugart, S, Sadras, VO, Lindfors, A, Morales, LO, Aphalo, PJ (2019)  
715 Responses of flavonoid profile and associated gene expression to solar blue and UV  
716 radiation in two accessions of *Vicia faba* L. from contrasting UV environments. *Photochem*  
717 *Photobiol Sci* 18: 434–447
- 718 Zhao, JY, Aisa, HA (2012) Synthesis and anti-influenza activity of aminoalkylrupestonates.  
719 *Bioorg. Med Chem Lett* 22: 2321–2325
- 720 Zhao, JY, Niu, C, Li, G, Aisa, HA (2017). Synthesis of rupestonic acid derivatives with antiviral  
721 activity. *Chem. Nat Compd* 53: 276–283
- 722 Zhou, Z, Chen, YH, He, JM, Xu, J, Zhang, RP, Mao, Y, Abliz, Z (2017) Systematic evaluation of  
723 serum and plasma collection on the endogenous metabolome. *Bioanalysis* 9: 239–250  
724  
725  
726
